# Supplementary material for: Improved adherence and growth outcomes with jet-delivered growth hormone
Source: publisher site journal article supplement (doi:10.1515/jpem-2018-0067), 2019-03-01
Supplement: Supplementary file 1 [file jpem-2018-0067_suppl.docx]

*Supplementary Table.*

*Summary of growth outcomes and adherence in children treated with JrGH.*

| **Study** | **N** | **Study period** | **Method** | **Adherence**  **measure** | **Growth outcome measure** | **% less-adherent** | **Median age (yr)** | **Conclusion** |
| --- | --- | --- | --- | --- | --- | --- | --- | --- |
| Kapoor et al, 2008 [20] | 31 | 2 year periods between 1999-2003 | Number of RGH injections dispensed by GP over 12 months | Missed <2 injections per week | Height velocity | 23% | 12.3 | Correlation between lower adherence and reduced height velocity, particularly in the first 2 years of treatment |
| Cutfield et al, 2011 [4] | 150 | 4 month interval in 2007 | Number of vials requested by family/number of empty vials returned | >85% (no more than one missed dose per week) | Height velocity  Average linear growth (over 6-8 months) | 66% | 12.1 | Positive correlation between adherence (rate of returned vials) and height velocity SDS and linear growth |
| Bozzola et al, 2014 [21] | 106 | 5.43 ± 3.01 years | 11/106 patients were identified as exhibiting growth failure despite rGH and were then interviewed | Medical interview | Height velocity | NA* | 10.5 | Non-adherence to growth hormone treatment is associated with growth failure |
| Aydin et al, 2014 [22] | 217 | 12 months | Percentage of RGH doses omitted | Missed <5% of injections | Height SDS, height velocity SDS (HVSDS), IGF-1 | 90.7% | 11.1 (M) 11.6 (F) | Negative correlation between number of missed injections and HVSDS.  Positive correlation between delta IGF-1 and HVDS |
| Loche et al, 2016 [17] | 53 | 12 months | Proportion of injections correctly administered using the easypod device | >300 injections over 12 months | Height SDS increment, IGF-1 | 43.3% | 10.0 | No correlation between adherence and height SDS increment or IGF-1. |
| Gau et al, 2017 [18] | 46 | 3 years | Missed injections based on self-reports | Missed injections | Height SDS increment, IGF-1 | 7.1% with choice 33% without choice | 7.70 ± 3.12 (mean ± SD) | Patient choice reduced the proportion of patients with less adherence |

* Not Applicable. All 11 patients with growth failure had poor adherence which was established in 4 patients by; lack of verification of adequate dosage, the possible onset of other chronic diseases such as celiac disease and the presence of anti-GH antibodies, together with interviews of patients and parents; and in 7 patients by “patients admitted poor adherence, although the patients were unwilling to openly confirm their parent’s declarations”.
